# Supplementary material for: Flammulina velutipes Mycorrhizae Attenuate High Fat Diet-Induced Lipid Disorder, Oxidative Stress and Inflammation in the Liver and Perirenal Adipose Tissue of Mice
Source: MDPI journal article supplement (doi:10.3390/nu14183830), 2022-09-16
Supplement: s1 [file s1]

**Table S1** Primers used in this study.

| Target        | Primer sequence                                                  | No.            |
|---------------|------------------------------------------------------------------|----------------|
| Slc27a1       | F: 5'-GCTTCAACAGCCGTATCCTC-3'<br>R: 3'-TCTTCTTGTTGGTGGCACTG-5'   | NM_001357180.1 |
| CD36          | F: 5'-TGCTGGAGCTGTTATTGGTG-3'<br>R: 3'-TGGGTTTTGCACATCAAAGA-5'   | NM_001159558.1 |
| FABP1         | F: 5'-GCAGAGCCAGGAGAACTTTG-3'<br>R: 3'-GTCTCCAGTTCGCACTCCTC-5'   | NM_017399.5    |
| ATGL          | F: 5'-ACAGTGTCCCCATTCTCAGG-3'<br>R: 3'-TTGGTTCAGTAGGCCATTCC-5'   | NM_001163689.1 |
| HSL           | F: 5'-AGACACCAGCCAACGGATAC-3'<br>R: 3'-ATCACCTCGAAGAAGAGCA-5'    | NM_001039507.2 |
| MGLL          | F: 5'-CAAGGCCCTCATCTTTGTGT-3'<br>R: 3'-ACTTGAAGTCCGACACCAC-5'    | NM_001166249.1 |
| CPT1 $\alpha$ | F: 5'-CCAGGCTACAGTGGGACATT-3'<br>R: 3'-GAACTTGCCCATGTCCTTGT-5'   | NM_013495.2    |
| MACD          | F: 5'-AGGTTTCAAGATCGCAATGG-3'<br>R: 3'-CTCCTTGGTGCTCCACTAGC-5'   | NM_007382.5    |
| SREBP1        | F: 5'-CACTCAGCAGCCACCATCTA-3'<br>R: 3'-GCTGTCAGCAGCAGTGAGTC-5'   | NM_001358314.1 |
| FASN          | F: 5'-TGGGTTCTAGCCAGCAGAGT-3'<br>R: 3'-ACCACCAGAGACCGTTATGC-5'   | NM_007988.3    |
| Acaca         | F: 5'-GCCTCTTCCTGACAAACGAG-3'<br>R: 3'-TGA CTGCCGAAACATCTCTG-5'  | NM_133360.2    |
| PGC1 $\alpha$ | F: 5'-ATGTGTCGCCTTCTTGCTCT-3'<br>R: 3'-ATCTACTGCCTGGGGACCTT-5'   | NM_008904.2    |
| TFAM          | F: 5'-CAGGAGGCAAAGGATGATTC-3'<br>R: 3'-ATGTCTCCGGATCGTTTCAC-5'   | NM_009360.4    |
| Nrf1          | F: 5'-CAACAGGGAAGAAACGGAAA-3'<br>R: 3'-GCACCACATTCTCAAAGGT-5'    | NM_001164226.1 |
| Nrf2          | F: 5'-CTCGCTGGAAAAAGAAGTGG -3'<br>R: 3'-CCGTCCAGGAGTTCAGAGAG-5'  | NM_010902.4    |
| IL1 $\beta$   | F: 5'-AGTTGCCTTCTTGGGACTGA-3'<br>R: 3'-TCCACGATTTCCCAGAGAAC-5'   | NM_008361.4    |
| IL6           | F: 5'-AGTTGCCTTCTTGGGACTGA-3'<br>R: 3'-CAGAATTGCCATTGCACAAC-5'   | NM_001314054.1 |
| TNF $\alpha$  | F: 5'-CGTCAGCCGATTTGCTATCT-3'<br>R: 3'-CGGACTCCGCAAAGTCTAAG-5'   | NM_001278601.1 |
| CCL-2         | F: 5'-AGGTCCCTGTCATGCTTCTG-3'<br>R: 3'-TCTGGACCCATTCTTCTTG-5'    | NM_011333.3    |
| TGF $\beta$   | F: 5'-TGCTAATGGTGGACCGCAA-3'<br>R: 3'-CACTGCTTCCCGAATGTCTGA-5'   | NM_011577.2    |
| IL10          | F: 5'-TGTCAAATTCATTTCATGGCCT-3'<br>R: 3'-ATCGATTTCTCCCCTGTGAA-5' | NM_010548.2    |

|         |                                                                        |                |
|---------|------------------------------------------------------------------------|----------------|
| CD206   | F: 5'-CATGGATGTTGATGGCTACTGGAG-3'<br>R: 3'-GTCTGTTCTGACTCTGGACACTTG-5' | NM_008625.2    |
| Fn1     | F: 5'-GGAGTGGCACTGTCAACCTC-3'<br>R: 3'-ACTGGATGGGGTGGGAAT-5'           | NM_001276413.1 |
| β-actin | F: 5'-AGCCATGTACGTAGCCATCC-3'<br>R: 3'-CTCTCAGCTGTGGTGGTGAA-5'         | NM_007393.5    |

---

FATP1/Slc27a1: fatty acid transport protein 1; CD36: fatty acid translocase; FABP1: fatty acid-binding protein; ATGL: adipose triglyceride lipase; MGLL: monoacylglycerol lipase; HSL: hormone sensitive lipase; CPT1α: carnitine O-palmitoyltransferase 1; MACD: medium-chain acyl-CoA dehydrogenase; SREBP1: sterol regulatory element-binding protein 1; FASN: fatty acid synthase; Acaca: acetyl-Coenzyme A carboxylase alpha. PGC1α: peroxisome proliferator-activated receptor gamma coactivator 1-alpha; TFAM transcription factor A, mitochondrial; Nrf1: nuclear respiratory factor 1; Nrf2: nuclear respiratory factor 2; TNFα: tumor necrosis factor α; CCL2: C-C motif chemokine 2; TGFβ1: transforming growth factor beta-1; Fn1: fibronectin 1; CD206: macrophage mannose receptor 1; The primers of TGFβ, IL10, Fn1 and CD206 were according to Liu et al.

#### Reference

Liu Y.; Wang L.; Luo M.; Chen N.; Deng X.; He J.; Zhang L.; Luo P.; Wu J. Inhibition of PAI-1 attenuates perirenal fat inflammation and the associated nephropathy in high-fat diet-induced obese mice. *Am. J. Physiol. Endoc. M.* 2019, 316, E260-E267.

**Table S2** The nutritional composition, harmful substances and heavy metals in FV mycorrhizae.

| Items                          | FV mycorrhizae | Methods                  |
|--------------------------------|----------------|--------------------------|
| <b>Nutritional composition</b> |                |                          |
| CP (%/DM)                      | 16.91 ± 0.12   | GB/T 6432-1994           |
| EE(%/DM)                       | 2.34 ± 0.08    | GB/T 6433-2006           |
| CF (%/DM)                      | 17.57 ± 0.98   | GB/T 6434-2006           |
| Ash (%/DM)                     | 8.19 ± 0.14    | GB/T 6438-2007           |
| NFE (%/DM)                     | 54.99 ± 2.35   |                          |
| Ca (%/DM)                      | 0.60 ± 0.05    | GB/T 6436-2002           |
| P (%/DM)                       | 0.70 ± 0.03    | GB/T 6437-2002           |
| Fe                             | 320            | GB/T 13885-2017          |
| Mn                             | 48             | GB/T 13885-2017          |
| Zn                             | 38             | GB/T 13885-2017          |
| Cu                             | 9.3            | GB/T 13885-2017          |
| Se                             | 0.07           | GB/T 13883-2008          |
| Na                             | 560            | GB/T 13885-2017          |
| Mg                             | 2800           | GB/T 13885-2017          |
| K                              | 34000          | GB/T 13885-2017          |
| <b>Harmful substances</b>      |                |                          |
| AFB1 (μg/kg)                   | ND             |                          |
| ZEN (μg/kg)                    | ND             |                          |
| DON (mg/kg)                    | <0.1           |                          |
| Salmonella                     | ND             |                          |
| <b>Heavy metals (mg/kg)</b>    |                |                          |
| Pb                             | 0.24           | GB/T 13080-2018<br>7.2   |
| Hg                             | 0.01           | GB/T 13081-2006<br>4     |
| Cd                             | ND             | GB/T 13082-2021<br>8.3.2 |
| As                             | 0.18           | GB/T 13079-2006<br>7     |

AFB1: Aflatoxin B1; ZEN: Zearalenone; DON: Deoxynivalenol; ND: not detected;

**Table S3** Amino acids contents and derivatives in FV mycorrhizae (μmol/g)

|                 | Item             | FV mycorrhizae |
|-----------------|------------------|----------------|
| EAAs            | Thr              | 2.063 ± 0.055  |
|                 | Leu              | 0.768 ± 0.024  |
|                 | Ile              | 0.576 ± 0.015  |
|                 | Met              | 0.002 ± 0      |
|                 | Val              | 1.663 ± 0.024  |
|                 | Lys              | 2.952 ± 0.066  |
|                 | Phe              | 1.142 ± 0.043  |
|                 | Trp              | 0.097 ± 0.002  |
| NEAAs           | Tyr              | 3.43 ± 0.067   |
|                 | Asp              | 1.281 ± 0.037  |
|                 | Asn              | 0.82 ± 0.016   |
|                 | Pro              | 0.863 ± 0.016  |
|                 | Ala              | 8.968 ± 0.258  |
|                 | Ser              | 2.834 ± 0.098  |
|                 | Gly              | 1.686 ± 0.083  |
|                 | Arg              | 2.941 ± 0.147  |
|                 | Gln              | 4.52 ± 0.089   |
|                 | Glu              | 6.898 ± 0.174  |
|                 | Cys              | ND             |
|                 | His              | 0.159 ± 0.002  |
|                 | Cystine          | 0.016 ± 0.003  |
| Derivatives     | Citrulline       | 0.049 ± 0.001  |
|                 | Ornithine        | 3.805 ± 0.075  |
|                 | Hydroxyproline   | 0.131 ± 0.002  |
|                 | Aminoadipic acid | 0.07 ± 0.002   |
|                 | Creatine         | 0.016 ± 0.001  |
|                 | Creatinine       | 0.001 ± 0      |
|                 | Choline          | 65.925 ± 1.719 |
|                 | Taurine          | 0.007 ± 0      |
| Biogenic amines | Spermidine       | ND             |
|                 | Putrescine       | 0.057 ± 0.003  |

EAAs: essential amino acids; NEAAs: non-essential amino acids; ND: not detected.
